# Supplementary material for: Ga(IO3)3: a mid-IR nonlinear optical iodate with balanced performance between band gap and second harmonic generation response
Source: Royal Society of Chemistry journal article supplement (doi:10.1039/d3tc01570j), 2023-01-01
Supplement: d3tc01570j1.pdf [file d3tc01570j1.pdf]

## Supporting Information

### **Ga(IO<sub>3</sub>)<sub>3</sub>: A mid-IR nonlinear optical iodate with balanced performance between band gap and second harmonic generation response**

*Dandan Wang,<sup>a, c</sup> Xinyuan Zhang,<sup>\*a</sup> Pifu Gong,<sup>\*b</sup> Zheshuai Lin,<sup>b</sup> Zhanggui Hu,<sup>a</sup> and Yicheng Wu<sup>a</sup>*

<sup>a</sup> Tianjin Key Laboratory of Functional Crystal Materials, Institute of Functional Crystals, Tianjin University of Technology, Tianjin 300384, China.

<sup>b</sup> Functional Crystals Lab, Technical Institute of Physics and Chemistry, Chinese Academy of Sciences, Beijing 100190, China.

<sup>c</sup> Huace Eco Environmental Technology (Tianjin) Company, Ltd., Tianjin 300399, China.

## Contents.

**Table S1.** Crystal data and structure refinements of  $\text{Ga}(\text{IO}_3)_3$ .

**Table S2.** Selected bond lengths ( $\text{\AA}$ ) of  $\text{Ga}(\text{IO}_3)_3$ .

**Table S3.** Selected bond angles ( $^\circ$ ) of  $\text{Ga}(\text{IO}_3)_3$ .

**Table S4.** Space group, SHG responses, band gap, birefringence for the iodate materials only including  $\text{IO}_3^-$  unit.

**Table S5.** Properties of NLO gallium iodates.

**Table S6.** Calculation of the dipole moment for  $\text{GaO}_6$  and  $\text{IO}_3$  polyhedrons and the net dipole moment for a unit cell, and BSI and GII indices of  $\text{Ga}(\text{IO}_3)_3$ .

**Figure S1.** The EDS spectrum of  $\text{Ga}(\text{IO}_3)_3$ .

**Figure S2.** (a) The TG and DSC curves and (b) PXRD pattern of the residual of  $\text{Ga}(\text{IO}_3)_3$ .

**Figure S3.** The IR spectrum of  $\text{Ga}(\text{IO}_3)_3$ .

**Figure S4.** The Raman spectrum of  $\text{Ga}(\text{IO}_3)_3$ .

**Figure S5.** Birefringence measurement of  $\text{Ga}(\text{IO}_3)_3$ .

**Figure S6.** The direction of dipole moments of  $\text{IO}_3^-$  units in  $\text{Ga}(\text{IO}_3)_3$ .

## 1. Supplementary Tables.

**Table S1.** Crystal data and structure refinements of Ga(IO<sub>3</sub>)<sub>3</sub>.

| Formula                    | Ga(IO <sub>3</sub> ) <sub>3</sub> |
|----------------------------|-----------------------------------|
| Temperature (K)            | 290                               |
| Crystal system             | Hexagonal                         |
| Space group                | <i>P</i> 6 <sub>3</sub>           |
| <i>a</i> (Å)               | 9.0924 (5)                        |
| <i>b</i> (Å)               | 9.0924 (5)                        |
| <i>c</i> (Å)               | 5.2862 (8)                        |
| $\alpha$ (°)               | 90                                |
| $\beta$ (°)                | 90                                |
| $\gamma$ (°)               | 120                               |
| <i>Z</i>                   | 2                                 |
| <i>V</i> (Å <sup>3</sup> ) | 378.47 (6)                        |
| $\mu$ (mm <sup>-1</sup> )  | 15.90                             |
| $R[F^2 > 2\sigma(F^2)]^a$  | 0.016                             |
| $wR(F^2)$                  | 0.037                             |

<sup>a</sup>  $R_1 = \Sigma||F_o| - |F_c||/\Sigma|F_o|$ ,  $\omega R_2 = [\Sigma\omega(F_o^2 - F_c^2)_2/\Sigma\omega(F_o^2)^2]^{1/2}$

**Table S2.** Selected bond lengths (Å) of Ga(IO<sub>3</sub>)<sub>3</sub>.

| Bond    | Length/Å |
|---------|----------|
| I1-O1   | 1.847(5) |
| I1-O2   | 1.804(6) |
| I1-O3   | 1.806(6) |
| Ga1-O1  | 1.980(2) |
| Ga1-O1  | 1.980(2) |
| Ga1-O1  | 1.980(2) |
| Ga1-O3  | 1.960(2) |
| Ga1-O3  | 1.960(2) |
| Ga1- O3 | 1.961(2) |

**Table S3.** Selected bond angles (°) of Ga(IO<sub>3</sub>)<sub>3</sub>.

| Angle     | (°)        |
|-----------|------------|
| O1-I1-O2  | 99.61(12)  |
| O1-I1-O3  | 94.68(11)  |
| O2-I1-O3  | 96.61(12)  |
| O1-Ga1-O1 | 90.75(11)  |
| O1-Ga1-O3 | 169.98(10) |
| O1-Ga1-O3 | 85.24(10)  |
| O1-Ga1-O3 | 98.46(10)  |
| O1-Ga1-O3 | 98.45(10)  |
| O3-Ga1-O3 | 86.28(10)  |

**Table S4.** Space group, SHG responses, band gap, birefringence for the iodate materials only including IO<sub>3</sub><sup>-</sup> unit.

| Compounds                                                                                       | Space group                                     | SHG effect (× KDP) | Band gap (eV) | Birefringence                                                 | Ref       |
|-------------------------------------------------------------------------------------------------|-------------------------------------------------|--------------------|---------------|---------------------------------------------------------------|-----------|
| LiMg(IO <sub>3</sub> ) <sub>3</sub>                                                             | <i>P6<sub>3</sub></i>                           | 24                 | 4.34          | 0.22 @ 1064 nm <sup>a</sup>                                   | S1        |
| K <sub>2</sub> Mg(IO <sub>3</sub> ) <sub>4</sub> (H <sub>2</sub> O) <sub>2</sub>                | <i>I2</i>                                       | 1.4                | 4.37          | 0.021 @ 1064 nm <sup>a</sup>                                  | S2        |
| Ba <sub>2</sub> [MoO <sub>3</sub> (OH)(IO <sub>3</sub> ) <sub>2</sub> ]IO <sub>3</sub>          | <i>P2<sub>1</sub></i>                           | 8                  | 3.78          | 0.225 @ 1064 nm <sup>a</sup>                                  | S3        |
| CdIO <sub>3</sub> F                                                                             | <i>P2<sub>1</sub>2<sub>1</sub>2<sub>1</sub></i> | 6.2                | 4.22          | 0.072 @ 1064 nm <sup>a</sup><br>0.068 @ 546.1 nm <sup>b</sup> | S4        |
| K <sub>5</sub> (W <sub>3</sub> O <sub>9</sub> F <sub>4</sub> )(IO <sub>3</sub> )                | <i>Pm</i>                                       | 11                 | 3.83          | 0.083 @ 1064 nm <sup>a</sup>                                  | S5        |
| (H <sub>3</sub> O)HCs <sub>2</sub> Nb(IO <sub>3</sub> ) <sub>9</sub>                            | <i>P2<sub>1</sub></i>                           | 6                  | 3.58          | 0.052 @ 1064 nm <sup>a</sup>                                  | S6        |
| LiZn(IO <sub>3</sub> ) <sub>3</sub>                                                             | <i>P6<sub>3</sub></i>                           | 14                 | 4.21          | 0.27 @ 1064 nm <sup>a</sup>                                   | S7        |
| LiCd(IO <sub>3</sub> ) <sub>3</sub>                                                             | <i>P6<sub>3</sub></i>                           | 12                 | 4.18          | 0.27 @ 1064 nm <sup>a</sup>                                   | S7        |
| NaVO <sub>2</sub> (IO <sub>3</sub> ) <sub>2</sub> (H <sub>2</sub> O)                            | <i>P2<sub>1</sub></i>                           | 20                 | 3.06          | 0.21 @ 1064 nm <sup>a</sup>                                   | S8        |
| K <sub>2</sub> Zn(IO <sub>3</sub> ) <sub>4</sub> (H <sub>2</sub> O) <sub>2</sub>                | <i>I2</i>                                       | 2.3                | 4.35          | 0.018 @ 1064 nm <sup>a</sup>                                  | S2        |
| BaNbO(IO <sub>3</sub> ) <sub>5</sub>                                                            | <i>Cc</i>                                       | 14                 | 3.64          | 0.035 @ 1064 nm <sup>a</sup>                                  | S9        |
| NH <sub>4</sub> [MoO <sub>3</sub> (IO <sub>3</sub> )]                                           | <i>Pna2<sub>1</sub></i>                         | 4.7                | 3.26          | 0.083 @ 1064 nm <sup>a</sup>                                  | S10       |
| KRb[(MoO <sub>3</sub> ) <sub>2</sub> (IO <sub>3</sub> ) <sub>2</sub> ]                          | <i>Cc</i>                                       | 8.5                | 3.32          | 0.146 @ 1064 nm <sup>a</sup>                                  | S10       |
| Ce(IO <sub>3</sub> ) <sub>4</sub>                                                               | <i>R3c</i>                                      | 0.9                | 2.17          | 0.049 @ 546 nm <sup>b</sup>                                   | S11       |
| Y(IO <sub>3</sub> ) <sub>2</sub> F                                                              | <i>P6<sub>5</sub></i>                           | 2                  | 3.91          | 0.041 @ 1064 nm <sup>a</sup>                                  | S12       |
| <i>β</i> -Sc(IO <sub>3</sub> ) <sub>3</sub>                                                     | <i>P6<sub>3</sub></i>                           | 16                 | 4.52          | 0.253 @ 546 nm <sup>a</sup><br>0.219 @ 546 nm <sup>b</sup>    | S13       |
| Ce(IO <sub>3</sub> ) <sub>2</sub> F <sub>2</sub> ·H <sub>2</sub> O                              | <i>Ima2</i>                                     | 3                  | 2.6           | 0.046 @ 1064 nm <sup>a</sup>                                  | S14       |
| Sn(IO <sub>3</sub> ) <sub>2</sub> F <sub>2</sub>                                                | <i>P2<sub>1</sub></i>                           | 3                  | 4.08          | 0.234 @ 1064 nm <sup>a</sup>                                  | S15       |
| Bi(IO <sub>3</sub> )F <sub>2</sub>                                                              | <i>C2</i>                                       | 11.5               | 3.97          | 0.209 @ 1064 nm <sup>a</sup>                                  | S16       |
| Bi <sub>2</sub> Te(IO <sub>3</sub> ) <sub>5</sub> Cl                                            | <i>Cc</i>                                       | 3                  | 3.6           | 0.091 @ 1064 nm <sup>a</sup>                                  | S17       |
| [GaF(H <sub>2</sub> O)][IO <sub>3</sub> F]                                                      | <i>Pca2<sub>1</sub></i>                         | 10                 | 4.34          | 0.142 @ 1064 nm <sup>a</sup>                                  | S18       |
| <i>α</i> -Ba <sub>2</sub> [GaF <sub>4</sub> (IO <sub>3</sub> ) <sub>2</sub> ](IO <sub>3</sub> ) | <i>Pna2<sub>1</sub></i>                         | ~ 6                | 4.61          | 0.126 @ 1064 nm <sup>a</sup>                                  | S19       |
| <i>β</i> -Ba <sub>2</sub> [GaF <sub>4</sub> (IO <sub>3</sub> ) <sub>2</sub> ](IO <sub>3</sub> ) | <i>P2<sub>1</sub></i>                           | ~ 6                | 4.35          | 0.135 @ 1064 nm <sup>a</sup>                                  | S19       |
| Ga(IO <sub>3</sub> ) <sub>3</sub>                                                               | <i>P6<sub>3</sub></i>                           | 13                 | 3.94          | 0.187 @ 1064 nm <sup>a</sup><br>0.159 <sup>b</sup>            | This work |

<sup>a</sup>. calculated birefringence; <sup>b</sup>. experimented birefringence.

**Table S5.** Properties of NLO gallium iodates.

| Compounds                                                                                       | Space group              | SHG effect ( $\times$ KDP) | Band gap (eV) | Birefringence                                      | Ref          |
|-------------------------------------------------------------------------------------------------|--------------------------|----------------------------|---------------|----------------------------------------------------|--------------|
| [GaF(H <sub>2</sub> O)][IO <sub>3</sub> F]                                                      | <i>Pca2</i> <sub>1</sub> | 10                         | 4.34          | 0.142 @ 1064 nm <sup>a</sup>                       | S18          |
| $\alpha$ -Ba <sub>2</sub> [GaF <sub>4</sub> (IO <sub>3</sub> ) <sub>2</sub> ](IO <sub>3</sub> ) | <i>Pna2</i> <sub>1</sub> | $\sim 6$                   | 4.61          | 0.126 @ 1064 nm <sup>a</sup>                       | S19          |
| $\beta$ -Ba <sub>2</sub> [GaF <sub>4</sub> (IO <sub>3</sub> ) <sub>2</sub> ](IO <sub>3</sub> )  | <i>P2</i> <sub>1</sub>   | $\sim 6$                   | 4.35          | 0.135 @ 1064 nm <sup>a</sup>                       | S19          |
| Ga(IO <sub>3</sub> ) <sub>3</sub>                                                               | <i>P6</i> <sub>3</sub>   | 13                         | 3.94          | 0.187 @ 1064 nm <sup>a</sup><br>0.159 <sup>b</sup> | This<br>work |

<sup>a</sup> calculated data; <sup>b</sup> experimented data.

**Table S6.** Calculation of the dipole moment for GaO<sub>6</sub> and IO<sub>3</sub> polyhedrons and the net dipole moment for a unit cell, and BSI and GII indices of Ga(IO<sub>3</sub>)<sub>3</sub>.

| Ga(IO <sub>3</sub> ) <sub>3</sub> (Z = 2) |                                          |                           |         |           |                 |
|-------------------------------------------|------------------------------------------|---------------------------|---------|-----------|-----------------|
| Species                                   | Valence of central atom                  | Dipole moment (D = Debye) |         |           |                 |
|                                           |                                          | x(a)                      | y(b)    | z(c)      | total magnitude |
| GaIO <sub>6</sub>                         | 3.1377                                   | 0                         | 0       | -1.5237   | 1.5237          |
| GaIO <sub>6</sub>                         | 3.1377                                   | 0                         | 0       | -1.5237   | 1.5237          |
| IO <sub>3</sub>                           | 4.9390                                   | 6.3867                    | -       | -37.2953  | 40.9627         |
| IO <sub>3</sub>                           | 4.9390                                   | 5.0027                    | 15.6911 | -32.4618  | 33.8013         |
| IO <sub>3</sub>                           | 4.9390                                   | -23.0483                  | 7.9833  | -27.6529  | 36.0563         |
| IO <sub>3</sub>                           | 4.9390                                   | -6.3867                   | 2.0361  | -37.2953  | 40.9627         |
| IO <sub>3</sub>                           | 4.9390                                   | 5.0027                    | 15.6911 | -32.4618  | 33.8013         |
| IO <sub>3</sub>                           | 4.9390                                   | -7.9833                   | -2.0361 | -27.6529  | 36.0563         |
| Net dipole moment (GaO <sub>6</sub> )     |                                          | 0                         | 0       | -3.0474   |                 |
| Net dipole moment (IO <sub>3</sub> )      |                                          | 0                         | 0       | -194.82   |                 |
| Net dipole moment (a unit cell)           |                                          | 0                         | 0       | -197.8674 |                 |
| Cell volume                               | 1163.45 Å <sup>3</sup>                   |                           |         |           |                 |
| Dipole moment density (IO <sub>3</sub> )  | 194.82/1163.45=0.167 D/Å <sup>3</sup>    |                           |         |           |                 |
| Dipole moment density (a unit cell)       | 197.8674/1163.45= 0.170 D/Å <sup>3</sup> |                           |         |           |                 |
| Bond Strain Index (BSI)                   | 0.190 vu                                 |                           |         |           |                 |
| Global Instability Index (GII)            | 0.178 vu                                 |                           |         |           |                 |



## 2. Supplementary Figures.

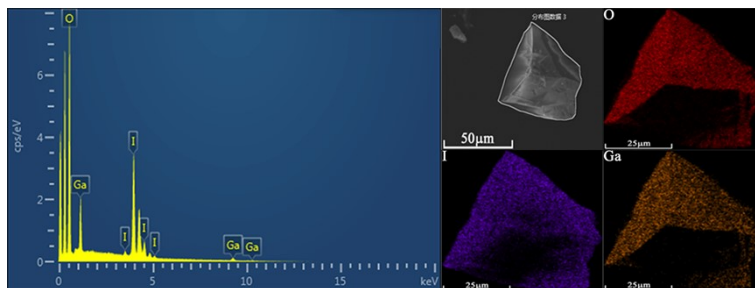

Figure S1. The EDS spectrum of Ga(IO<sub>3</sub>)<sub>3</sub>.

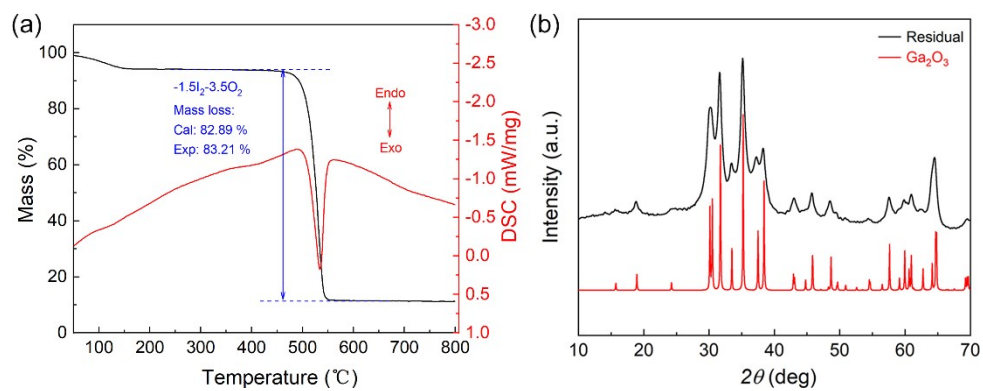

**Figure S2.** (a) The TG and DSC curves and (b) PXRD pattern of the residual of  $\text{Ga}(\text{IO}_3)_3$ .

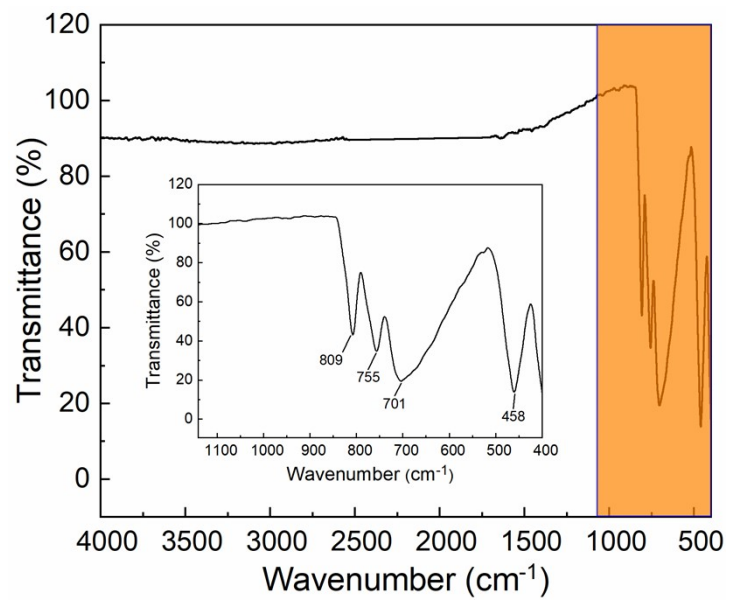

**Figure S3.** The IR spectrum of Ga(IO<sub>3</sub>)<sub>3</sub>.

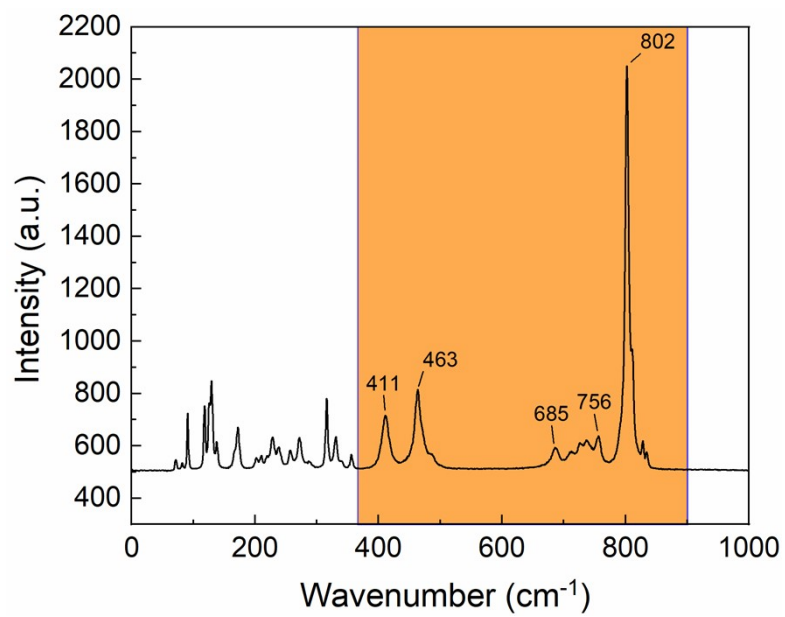

**Figure S4.** The Raman spectrum of Ga(IO<sub>3</sub>)<sub>3</sub>.

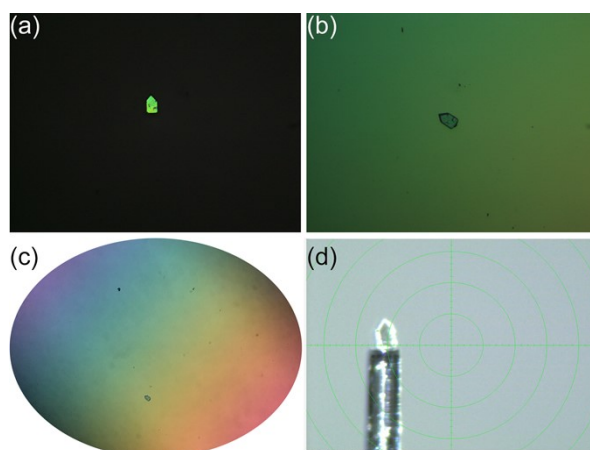

**Figure S5.** Birefringence measurement of  $\text{Ga}(\text{IO}_3)_3$ ; (a) the original crystal; (b) the crystal in the extinction state; (c) the crystal interference color observed under the microscope and (d) the photographs of crystal thickness.

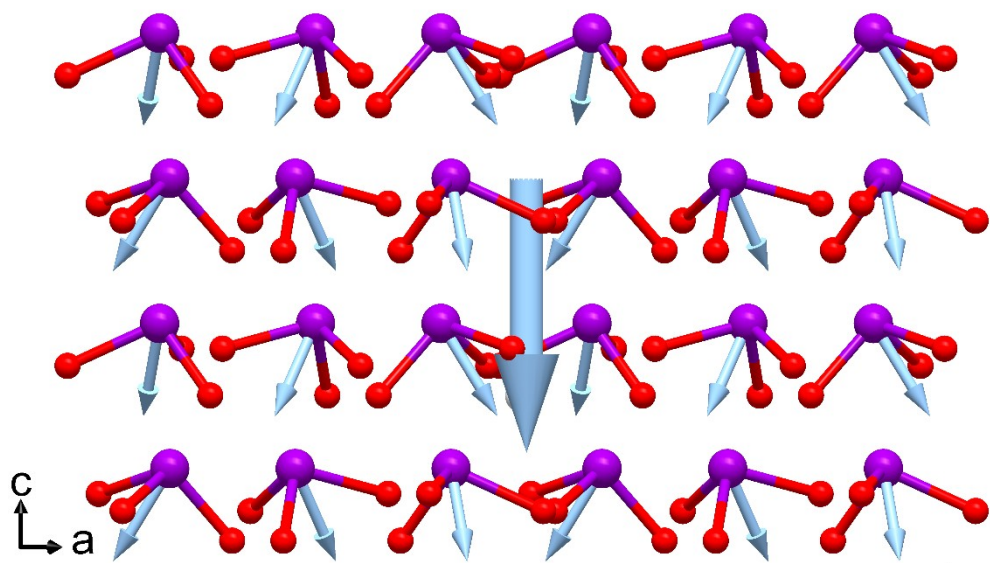

**Figure S6.** The direction of dipole moments of  $\text{IO}_3^-$  units in  $\text{Ga}(\text{IO}_3)_3$ .

## References

- S1. J. Chen, C. L. Hu, F. F. Mao, X. H. Zhang, B. P. Yang and J. G. Mao, LiMg(IO<sub>3</sub>)<sub>3</sub>: an excellent SHG material designed by single-site aliovalent substitution, *Chem. Sci.*, 2019, **10**, 10870-10875.
- S2. P. X. Li, C. L. Hu, X. Xu, R. Y. Wang, C. F. Sun and J. G. Mao, Explorations of New Second-Order Nonlinear Optical Materials in the K<sup>I</sup>-M<sup>II</sup>-IV-O Systems, *Inorg. Chem.*, 2010, **49**, 4599-4605.
- S3. Q. M. Huang, C. L. Hu, B. P. Yang, R. L. Tang, J. Chen, Z. Fang, B. X. Li and J. G. Mao, Ba<sub>2</sub>[MoO<sub>3</sub>(OH)(IO<sub>3</sub>)<sub>2</sub>]IO<sub>3</sub>: A promising SHG material featuring a Λ-shaped functional motif achieved by universal mono-site substitution, *Chem. Mater.*, 2020, **32**, 6780-6787.
- S4. L. L. Cao, M. Luo, C. S. Lin, T. Yan and N. Ye, From centrosymmetric to noncentrosymmetric: intriguing structure evolution in d<sup>10</sup>-transition metal iodate fluorides, *Chem. Commun.*, 2020, **56**, 10734-10737.
- S5. C. Wu, L. Lin, X. X. Jiang, Z. S. Lin, Z. P. Huang, M. G. Humphrey, P. S. Halasyamani and C. Zhang, K<sub>5</sub>(W<sub>3</sub>O<sub>9</sub>F<sub>4</sub>)(IO<sub>3</sub>): An Efficient Mid-Infrared Nonlinear Optical Compound with High Laser Damage Threshold, *Chem. Mater.*, 2019, **31**, 10100-10108.
- S6. F. F. Mao, C. L. Hu, J. Chen, R. L. Tang, B. L. Wu and J. G. Mao, (H<sub>3</sub>O)HCs<sub>2</sub>Nb(IO<sub>3</sub>)<sub>9</sub> and SrNbO(IO<sub>3</sub>)<sub>5</sub>: a facile synthetic method using hydrofluoric acid as a solubilizer, *Chem. Commun.*, 2019, **55**, 6906-6909.
- S7. Y. J. Jia, Y. G. Chen, Y. Guo, X. F. Guan, C. B. Li, B. X. Li, M. M. Liu and X. M. Zhang, LiM<sup>II</sup>(IO<sub>3</sub>)<sub>3</sub> (M<sup>II</sup> = Zn and Cd): Two Promising Nonlinear Optical Crystals Derived from a Tunable Structure Model of α-LiIO<sub>3</sub>, *Angew. Chem. Int. Ed.*, 2019, **58**, 17194-17198.
- S8. B. P. Yang, C. L. Hu, X. Xu, C. F. Sun, J. H. Zhang and J. G. Mao, NaVO<sub>2</sub>(IO<sub>3</sub>)<sub>2</sub>(H<sub>2</sub>O): A unique layered material produces a very strong shg response, *Chem. Mater.*, 2010, **22**, 1545-1550.
- S9. C. F. Sun, C. L. Hu, X. Xu, J. B. Ling, T. Hu, F. Kong, X. F. Long and J. G. Mao, BaNbO(IO<sub>3</sub>)<sub>5</sub>: A New Polar Material with a Very Large SHG Response, *J. Am. Chem. Soc.*, 2009, **131**, 9486-9487.
- S10. Y. H. Li, G. P. Han, H. W. Yu, H. Li, Z. H. Yang and S. L. Pan, Two Polar Molybdenum(VI) Iodates(V) with Large Second-Harmonic Generation Responses, *Chem. Mater.*, 2019, **31**, 2992-3000.
- S11. T. H. Wu, X. X. Jiang, C. Wu, H. Y. Sha, Z. J. Wang, Z. S. Lin, Z. P. Huang, X. F. Long, M. G. Humphrey and C. Zhang, From Ce(IO<sub>3</sub>)<sub>4</sub> to CeF<sub>2</sub>(IO<sub>3</sub>)<sub>2</sub>: fluorinated homovalent substitution simultaneously enhances SHG response and bandgap for mid-infrared nonlinear optics, *J. Mater. Chem. C*, 2021, **2**, 8987-8993.
- S12. G. Peng, Y. Yang, T. Yan, D. Zhao, B. Li, G. Zhang, Z. Lin and N. Ye, Helix-constructed polar rare-earth iodate fluoride as a laser nonlinear optical multifunctional material, *Chem. Sci.*, 2020, **11**, 7396-7400.
- S13. C. Wu, G. F. Wei, X. X. Jiang, Q. K. Xu, Z. S. Lin, Z. P. Huang, M. G. Humphrey and C. Zhang, Additive-Triggered Polar Polymorph Formation: β-Sc(IO<sub>3</sub>)<sub>3</sub>, a Promising Next-Generation Mid-

- Infrared Nonlinear Optical Material, *Angew. Chem. Int. Ed.*, 2022, **61**, e202208514.
- S14. T. Abudouwufu, M. Zhang, S. C. Cheng, Z. H. Yang and S. L. Pan, Ce(IO<sub>3</sub>)F<sub>2</sub>·H<sub>2</sub>O: The First Rare-Earth-Metal Iodate Fluoride with Large Second Harmonic Generation Response, *Chem.-Eur. J.*, 2019, **25**, 1221-1226.
- S15. M. Luo, F. Liang, X. Hao, D. H. Lin, B. X. Li, Z. S. Lin and N. Ye, Rational Design of the Nonlinear Optical Response in a Tin Iodate Fluoride Sn(IO<sub>3</sub>)<sub>2</sub>F<sub>2</sub>, *Chem. Mater.*, 2020, **32**, 2615-2620.
- S16. F. F. Mao, C. L. Hu, X. Xu, D. Yan, B. P. Yang and J. G. Mao, Bi(IO<sub>3</sub>)F<sub>2</sub>: The First Metal Iodate Fluoride with a Very Strong Second Harmonic Generation Effect, *Angew. Chem. Int. Ed.*, 2017, **56**, 2151-2155.
- S17. L. Geng, C.-Y. Meng, H. Y. Lu, Z. Z. Luo, C. S. Lin and W. D. Cheng, Bi<sub>2</sub>Te(IO<sub>3</sub>)O<sub>5</sub>Cl: a novel polar iodate oxychloride exhibiting a second-order nonlinear optical response, *Dalton Trans.*, 2015, **44**, 2469-2475.
- S18. Q. M. Huang, C. L. Hu, B. P. Yang, Z. Fang, Y. Lin, J. Chen, B. X. Li and J. G. Mao, [GaF(H<sub>2</sub>O)][IO<sub>3</sub>F]: a promising NLO material obtained by anisotropic polycation substitution, *Chem. Sci.*, 2021, **12**, 9333-9338.
- S19. J. Chen, C. L. Hu, F. F. Mao, J. H. Feng and J. G. Mao, A Facile Route to Nonlinear Optical Materials: Three-Site Aliovalent Substitution Involving One Cation and Two Anions, *Angew. Chem. Int. Ed.*, 2019, **58**, 2098-2102.
